# Supplementary material for: The Development and Evaluation of Reagentless Glucose Biosensors Using Dendritic Gold Nanostructures as a Promising Sensing Platform
Source: MDPI journal article supplement (doi:10.3390/bios13070727), 2023-07-13
Supplement: s1 [file s1]

# The Development and Evaluation of Reagentless Glucose Biosensors Using Dendritic Gold Nanostructures as a Promising Sensing Platform

Natalija German<sup>1</sup>, Anton Popov<sup>1,2</sup> and Almira Ramanaviciene<sup>1,2,\*</sup>

<sup>1</sup> Department of Immunology, State Research Institute Centre for Innovative Medicine, LT-08406, Vilnius, Lithuania; natalija.german@imcentras.lt (N.G.); anton.popov@chgf.vu.lt (A.P.)

<sup>2</sup> NanoTechnas – Center of Nanotechnology and Materials Science, Faculty of Chemistry and Geosciences, Vilnius University, LT-03225, Vilnius, Lithuania

\* Correspondence: almira.ramanaviciene@chf.vu.lt

## Supplementary data

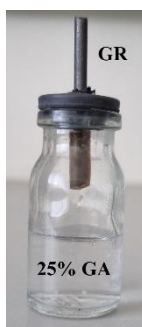

**Figure S1.** Image of GOx modified GR electrode storage in a closed vessel over 25% solution of GA for 15 min at  $+20 \pm 2$  °C.

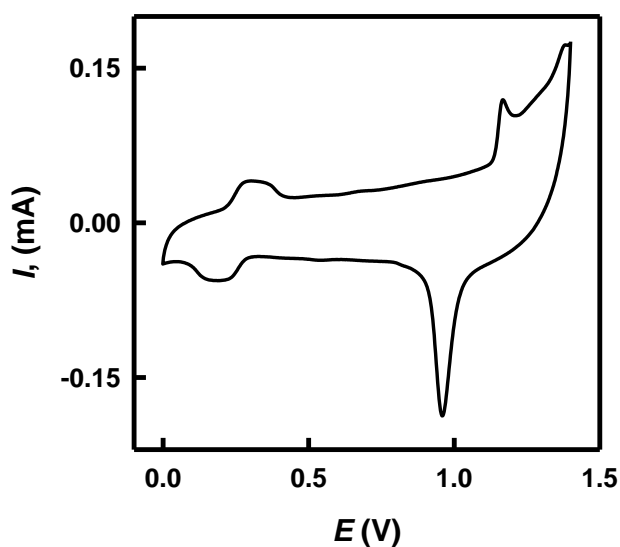

**Figure S2.** Cyclic voltammogram registered using GR/DGNs electrode in  $0.5 \text{ mol L}^{-1} \text{ H}_2\text{SO}_4$  solution.

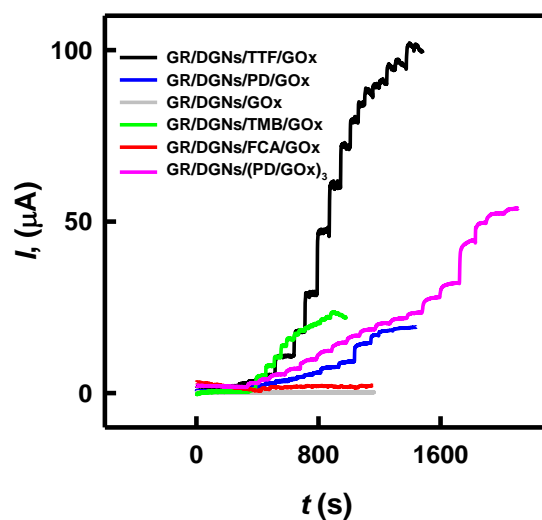

**Figure S3.** Amperograms registered using enzymatic glucose biosensors based on GR electrodes modified by DGNs, without or with redox mediators. Experiments were performed in 0.05 mol L<sup>-1</sup> SA buffer, pH 6.0, with 0.1 mol L<sup>-1</sup> KCl. (Supplement to Figure 3)

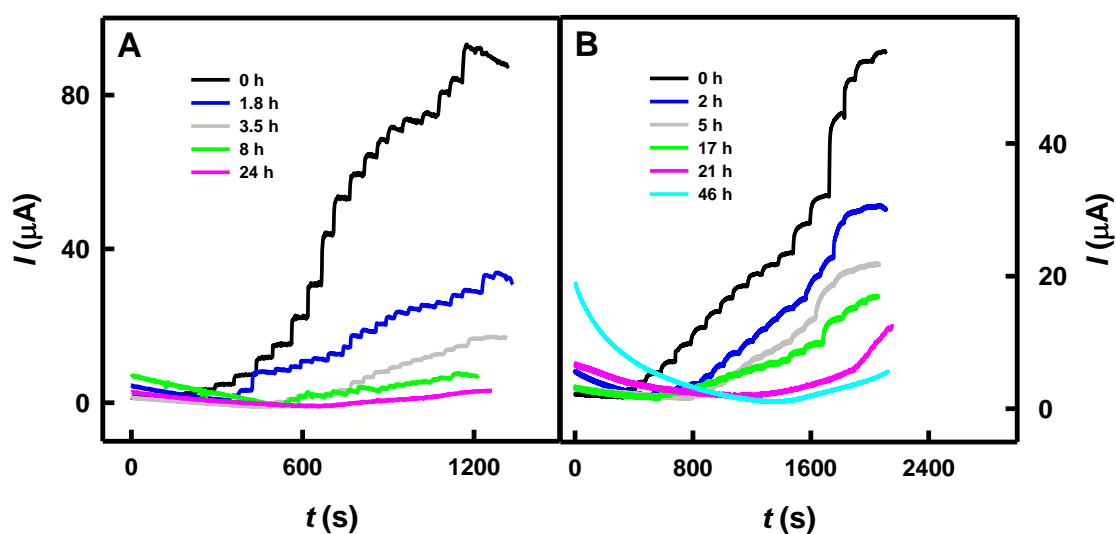

**Figure S4.** Amperograms registered using biosensors based on GR/DGNs/TTF/GOx/Ppy (A) and GR/DGNs/(PD/GOx)<sub>3</sub>/Ppy (B) electrodes fabricated using various polymerization times. Experiments were performed in 0.05 mol L<sup>-1</sup> SA buffer, pH 6.0, with 0.1 mol L<sup>-1</sup> KCl at +0.40 V vs Ag/AgCl(3 mol L<sup>-1</sup> KCl). (Supplement to Figures 4 and 5)

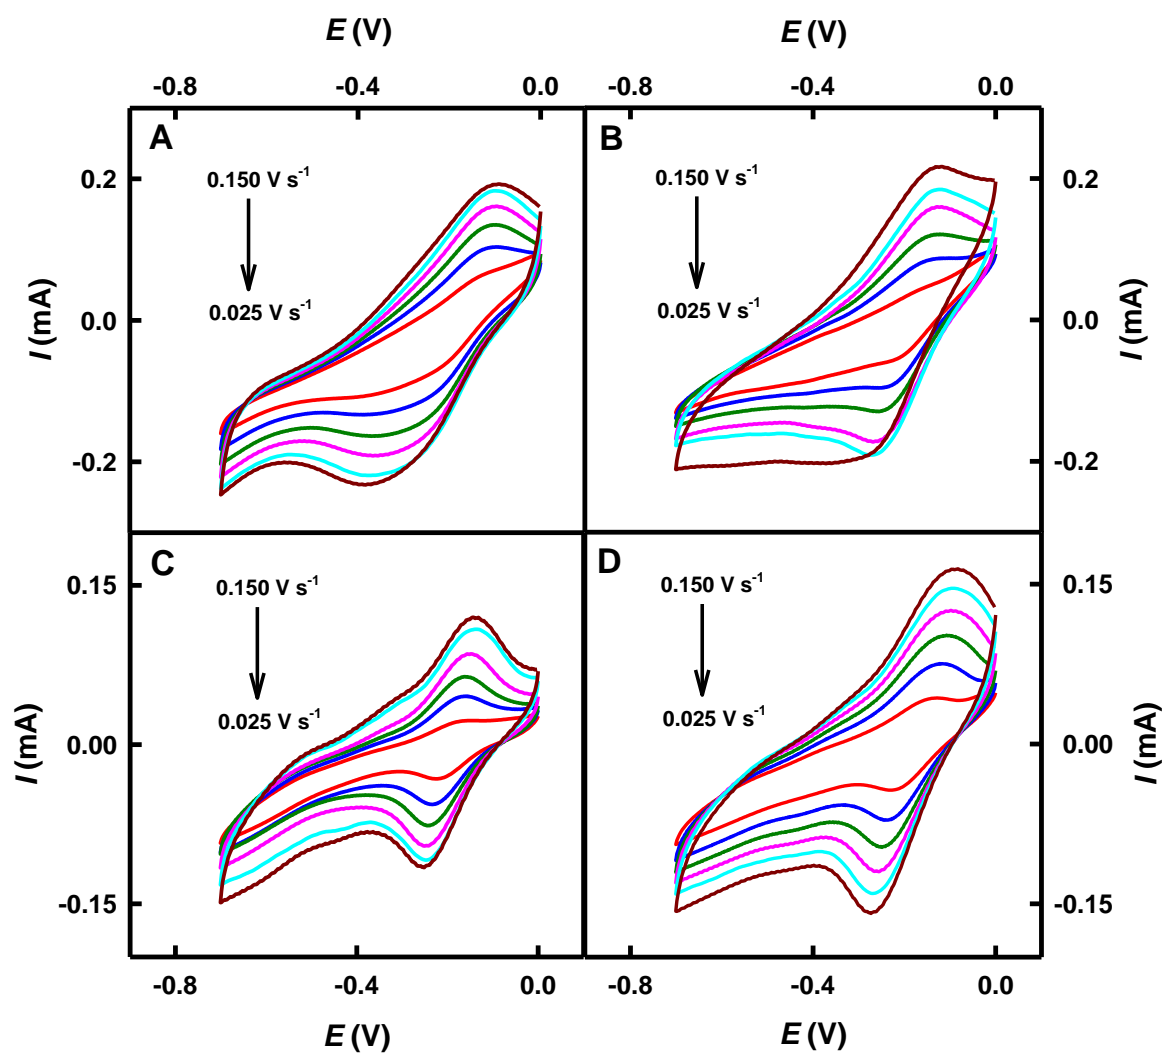

**Figure S5.** Cyclic voltammograms of GR/DGNs/TTF/GOx (A), GR/DGNs/TTF/GOx/Ppy(3.5 h) (B), GR/DGNs/(PD/GOx)<sub>3</sub> (C) and GR/DGNs/(PD/GOx)<sub>3</sub>/Ppy(5 h) (D) electrodes registered at different scan rates from 0.025 to 0.150  $\text{V s}^{-1}$  in the solution of 0.1 mol  $\text{L}^{-1}$  KCl with 1 mmol  $\text{L}^{-1}$   $\text{Ru}(\text{NH}_3)_6\text{Cl}_3$ .

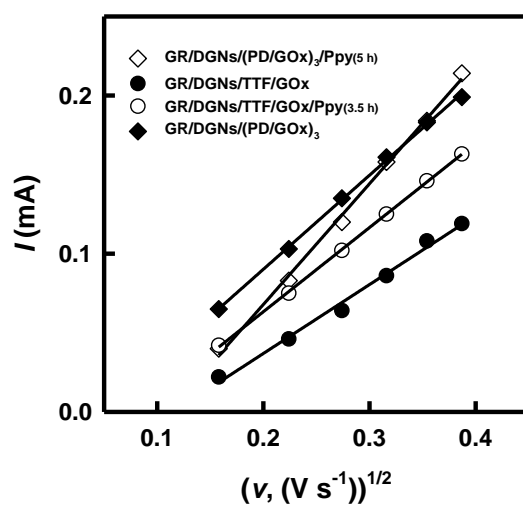

**Figure S6.** The relationships between square root of scan rate and registered peak anodic current.

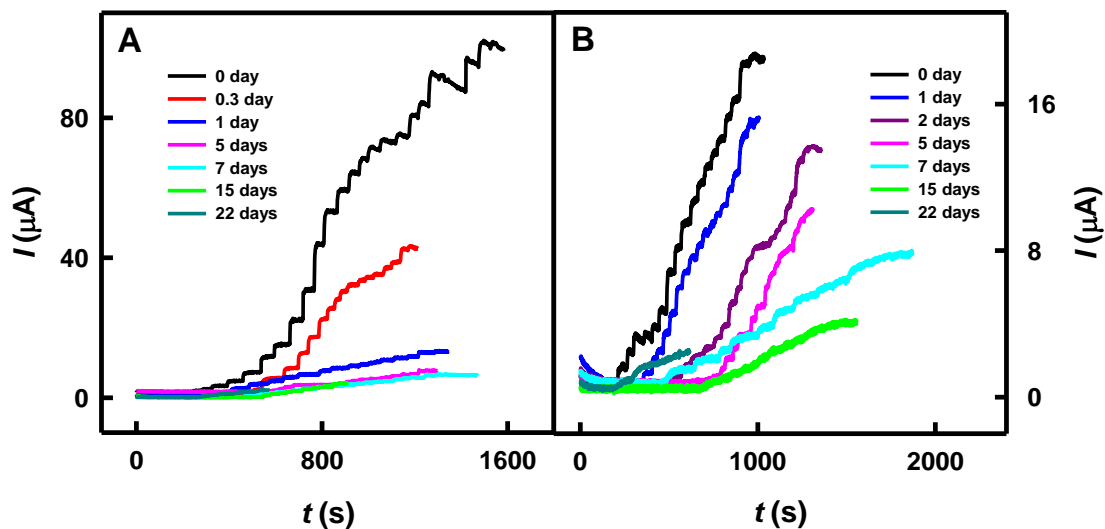

**Figure S7.** Amperograms registered at different times after preparation of biosensors based on GR/DGNs/TTF/GOx (A) and GR/DGNs/TTF/GOx/Ppy(3.5 h) (B) electrodes. Experiments were performed in 0.05 mol L<sup>-1</sup> SA buffer, pH 6.0, with 0.1 mol L<sup>-1</sup> KCl at +0.40 V vs Ag/AgCl(3 mol L<sup>-1</sup> KCl). (Supplement to Figure 6A,B)

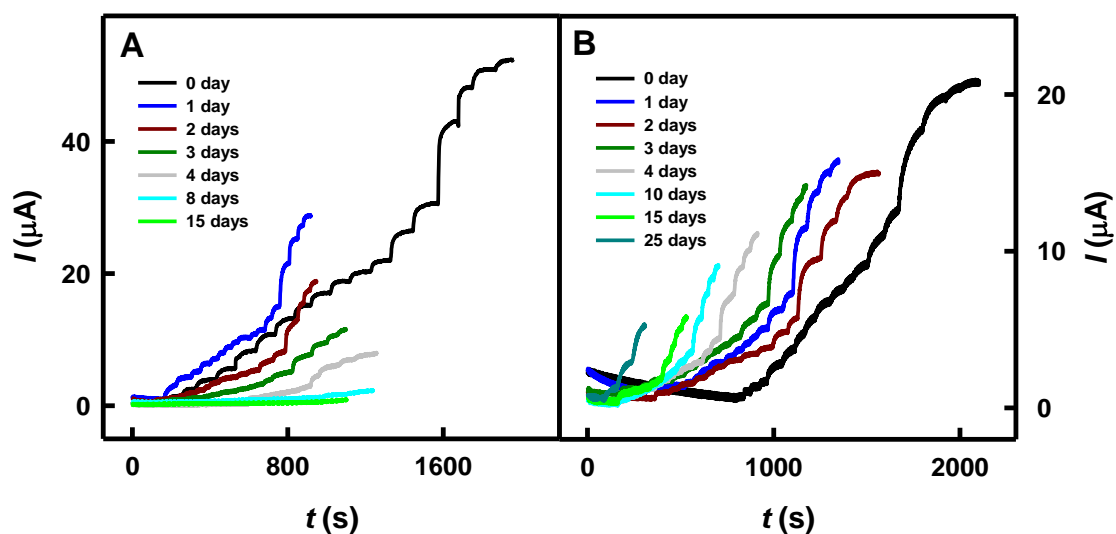

**Figure S8.** Amperograms registered at different times after preparation of biosensors based on GR/DGNs/(PD/GOx)<sub>3</sub> (A) and GR/DGNs/(PD/GOx)<sub>3</sub>/Ppy(5 h) (B) electrodes. Experiments were performed in 0.05 mol L<sup>-1</sup> SA buffer, pH 6.0, with 0.1 mol L<sup>-1</sup> KCl at +0.40 V vs Ag/AgCl(3 mol L<sup>-1</sup> KCl). (Supplement to Figure 6C,D)
